# Supplementary material
Source: publisher figshare collection journal article supplement (https://future-science-group.figshare.com/ndownloader/files/28985226)
Supplement: Supplementary file 1 [file 28985226]

**Supplemental Information:** Database search strategy

| **Keywords:** ("COLORECTAL CANCER" OR "COLORECTAL CANCER" OR "COLON CANCER") AND ("MSI" OR "MMR" OR "MISMATCH REPAIR" OR "MICROSATELLITE INSTABILITY") | | |
| --- | --- | --- |
| **Database** | **Applied Search Filters** | **Number of Studies** |
| PubMed | 1. Species: humans 2. Language: English 3. Age: Adult (19+) | 2937 |
| Embase | 1. Study types: human 2. Sources: Embase 3. Publication types: article | 616 |
| ASCO | 1. Tracks: gastrointestinal cancers: colorectal and anal (ASCO 2020) 2. Tracks: Cancers of the Colon, Rectum, and Anus (ASCO GI21) 3. Tracks: Colorectal Cancer (ASCO GI21) | 286 |
| ESMO | 1. Topics: Colorectal Cancer | 60 |
| AACR | None | 322 |
